# Supplementary material for: El principio "Nulla poena sine lege" en la axiología egológica
Source: HighWire-hosted journal article supplement (doi:10.1136/heartjnl-2020-316944), 2012-01-01

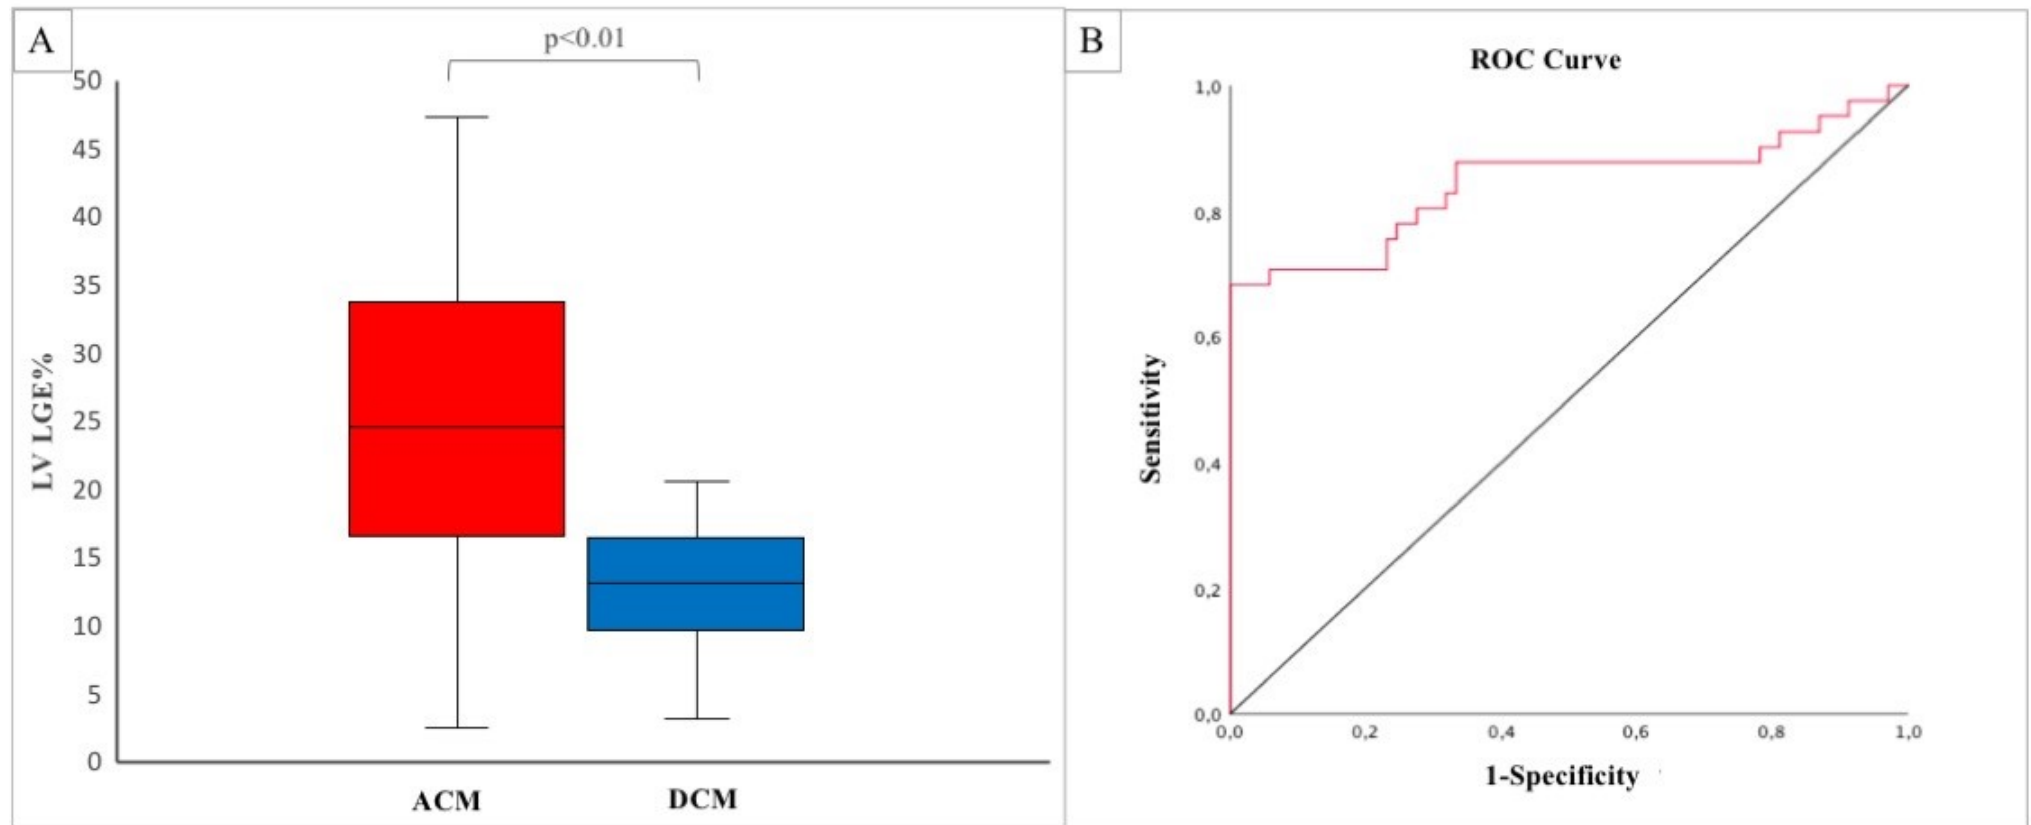

Supplement: heartjnl-2020-316944supp001_data_supplement.pdf [file heartjnl-2020-316944supp001_data_supplement.pdf]
