# Supplementary figures and images for: Arrhythmogenic left ventricular cardiomyopathy
Source: PubMed Central journal article supplement — Heart. 2021 Jul 13;108(9):733–43. doi: 10.1136/heartjnl-2020-316944 (PMC8995901; doi:10.1136/heartjnl-2020-316944), 2021-07-13

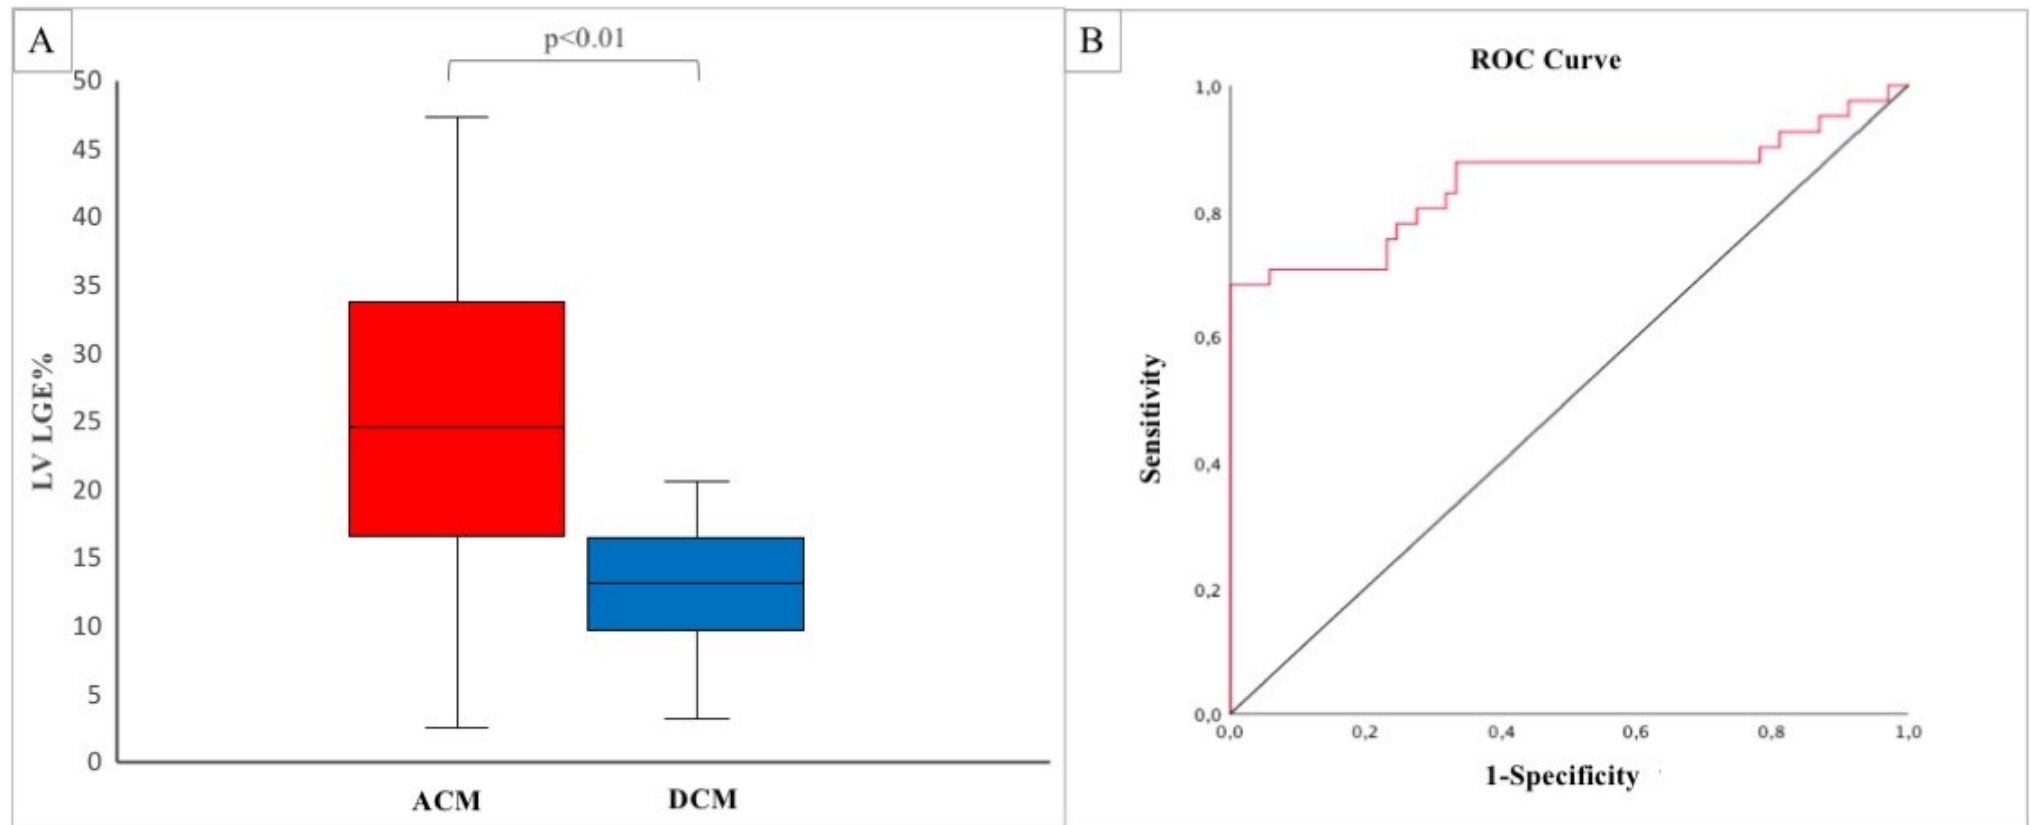

Supplement: heartjnl-2020-316944supp001.pdf [file heartjnl-2020-316944supp001.pdf]

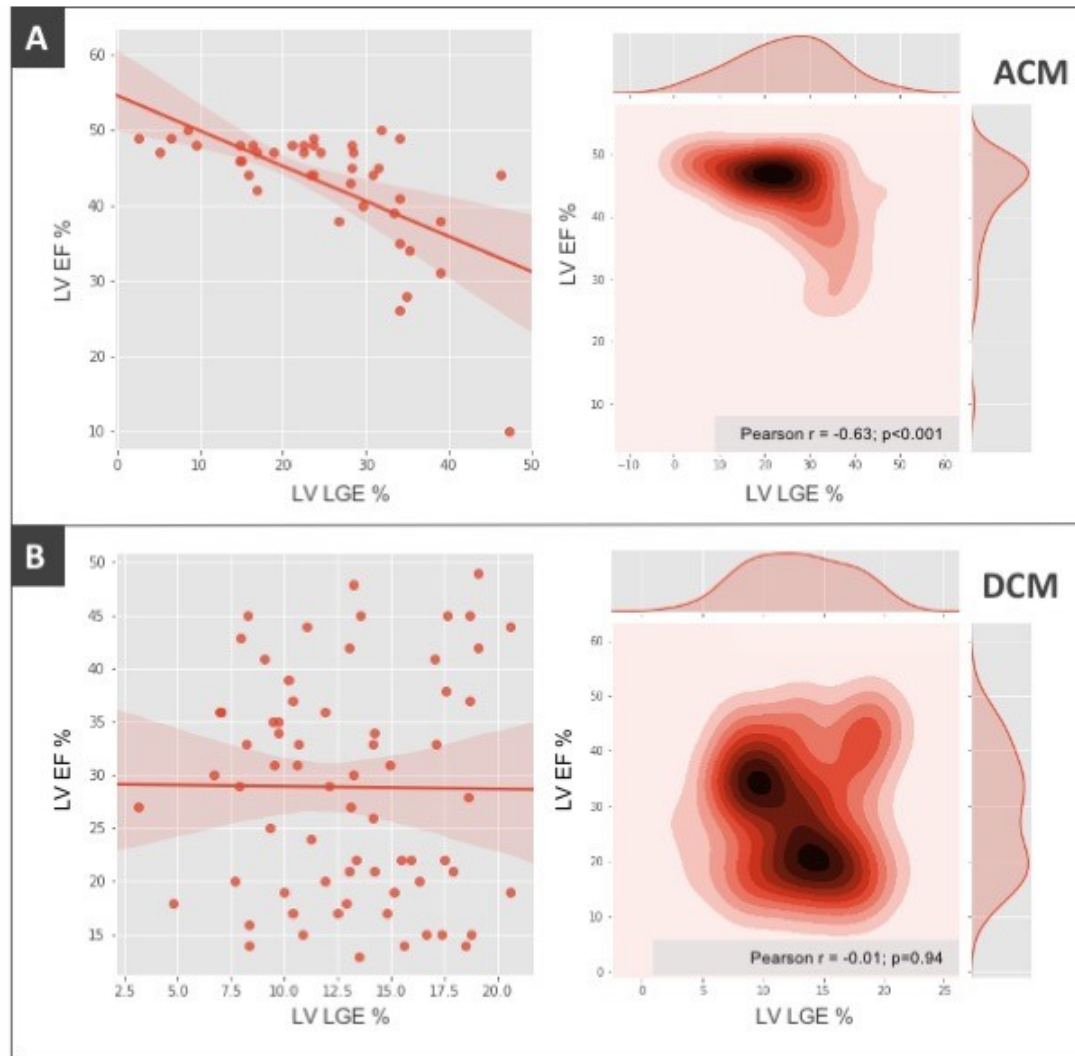

Supplement: heartjnl-2020-316944supp002.pdf [file heartjnl-2020-316944supp002.pdf]
